# Supplementary figures and images for: Knowledge gaps in the understanding of fertility among non-medical graduate students
Source: PubMed Central journal article supplement — F S Rep. 2020 Aug 8;1(3):177–85. doi: 10.1016/j.xfre.2020.08.002 (PMC8244259; doi:10.1016/j.xfre.2020.08.002), 2020-08-08

Under 35 years

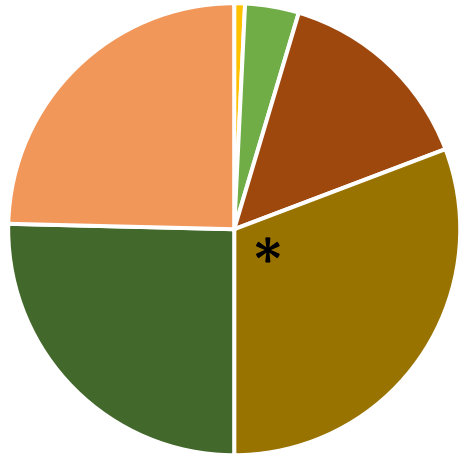

35-40 years

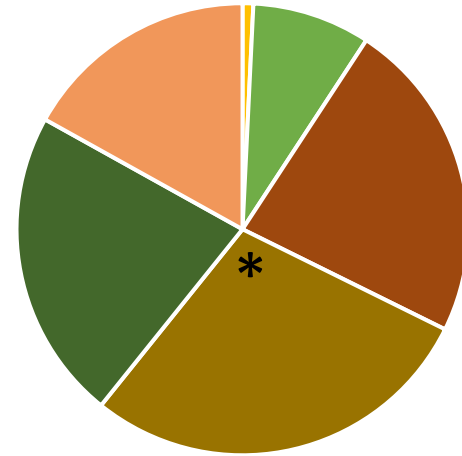

41-45 years

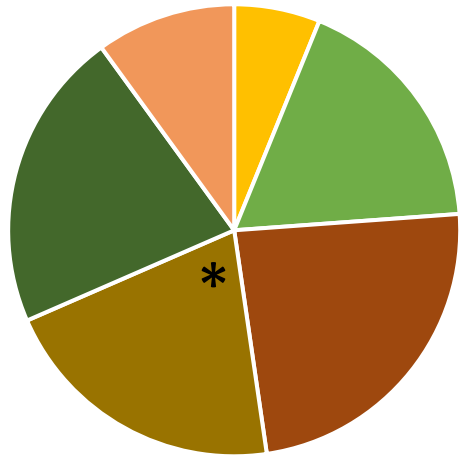

46-50 years

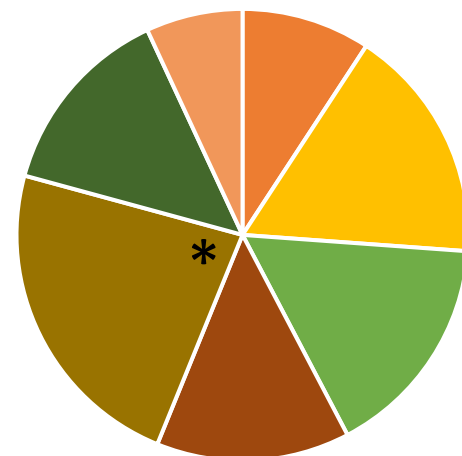

- 1%
- 5%
- 10%
- 15%
- 25%
- 40%
- 80%

\*Denotes correct response

Supplement: mmc2.pdf [file mmc2.pdf]

35-40 years

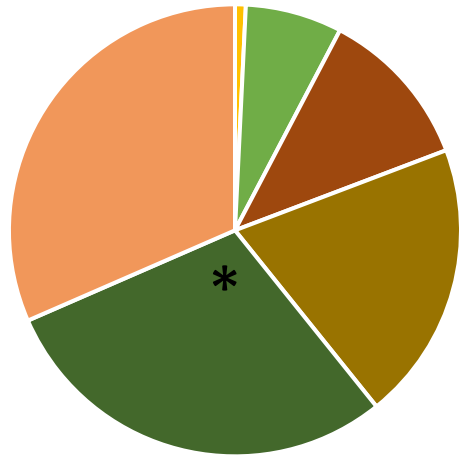

41-42 years

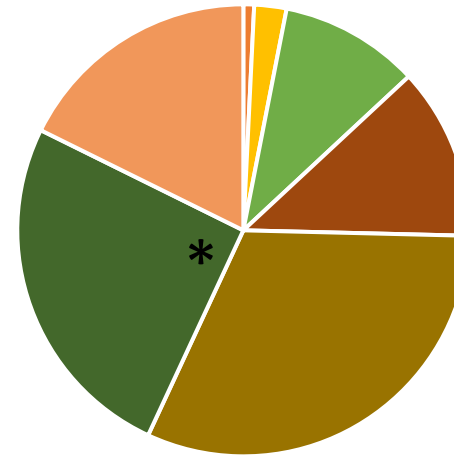

43-44 years

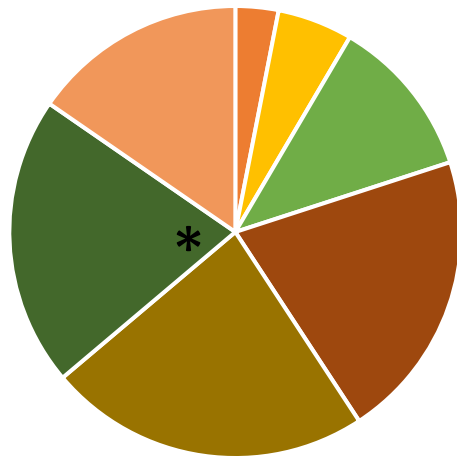

45-47 years

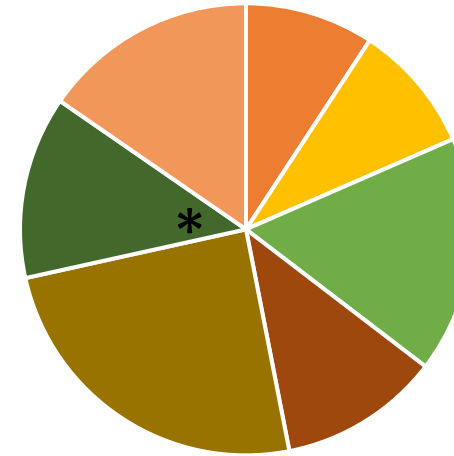

- 1%
- 5%
- 10%
- 15%
- 25%
- 40%
- 80%

\*Denotes correct response

Supplement: mmc3.pdf [file mmc3.pdf]
